# Supplementary material
Source: publisher site journal article supplement (https://www.dovepress.com/article/536630)

Supplementary Table S1. **List of** **All Predictors Considered in the Study**

| **Variable category** | **Variable name** | | **Measurement timepoint** |
| --- | --- | --- | --- |
| **Preoperative**  **Factors** | Age（years） | | / |
| BMI (kg/m2) | | **/** |
| Gender (Female/male) | | / |
| Education (Lower/ Advanced) | | **/** |
| History of cigarette use (Yes/No) | | **/** |
| Sleep disturbance preoperative night (Yes/No) | | Preoperative night |
| Hypertension (Yes/No) | | **/** |
| Diabetes (Yes/No) | | **/** |
| Cardiac disease (Yes/No) | | **/** |
| OSAHS (Yes/No) | | **/** |
| History of tumor (Yes/No) | | **/** |
| Anemia  (No/ Light/ Moderate to Severe） | | Based on complete blood count test conducted during hospitalization |
| Surgical history (Yes/No) | | **/** |
| Depression (Yes/No) | | **Prior to surgery through the Hospital Anxiety and Depression Scale (HADS)** |
| Anxiety (Yes/No) | | **Prior to surgery through the Hospital Anxiety and Depression Scale (HADS)** |
| ASA physical status (I/II/III) | | **/** |
| Ward environment satisfaction (Yes/No) | | **Postoperative day 3** |
| Type of surgery (Abdominal/Thoracic/  Head and Neck/Breast/Gynecological/Urological/Arthroplasty/Other Specified) | | **/** |
| **Intraoperative**  **Factors** | Duration of anesthesia (min) | | **Intraoperative measurement** |
| Induction timing  (morning/afternoon) | | **Intraoperative measurement** |
| **Total dose of sufentanil (ug)** | | **Intraoperative measurement** |
| **Total dose of r**emifentanil (mg) | | **Intraoperative measurement** |
| Use of dexmedetomidin (Yes/No) | | **Intraoperative measurement** |
| Use of sevoflurane (Yes/No) | | **Intraoperative measurement** |
| **Postoperative**  **Factors** | | Time to extubation (min) | During the postoperative recovery period in the PACU |
| PCIA utilization (Yes/No) | **Intraoperative measurement** |
| PONV (Yes/No) | Postoperative day 3 |
| **Length of hospital stay (d)** | At discharge |
| Blood transfusion requirements (Yes/No)  NRS score | During hospitalization  Postoperative day 3 |

Abbreviations: BMI, body mass index; OSAHS, obstructive sleep apnea hypopnea syndrome; ASA, American Society of Anesthesiologists physical status classification; PACU*,* post-anesthesia care unit; PCIA, patient controlled intravenous analgesia; PONV, postoperative nausea and vomiting; NRS score, numeric rating score for pain; “/” indicates these factors are baseline characteristics not requiring repeated measurement.

:

Supplementary Figure S1. The online dynamic nomogram. After entering the patient’s data on the left side, click the “Predict” button to calculate the probability of the patient having PSD and its 95% confidence interval.


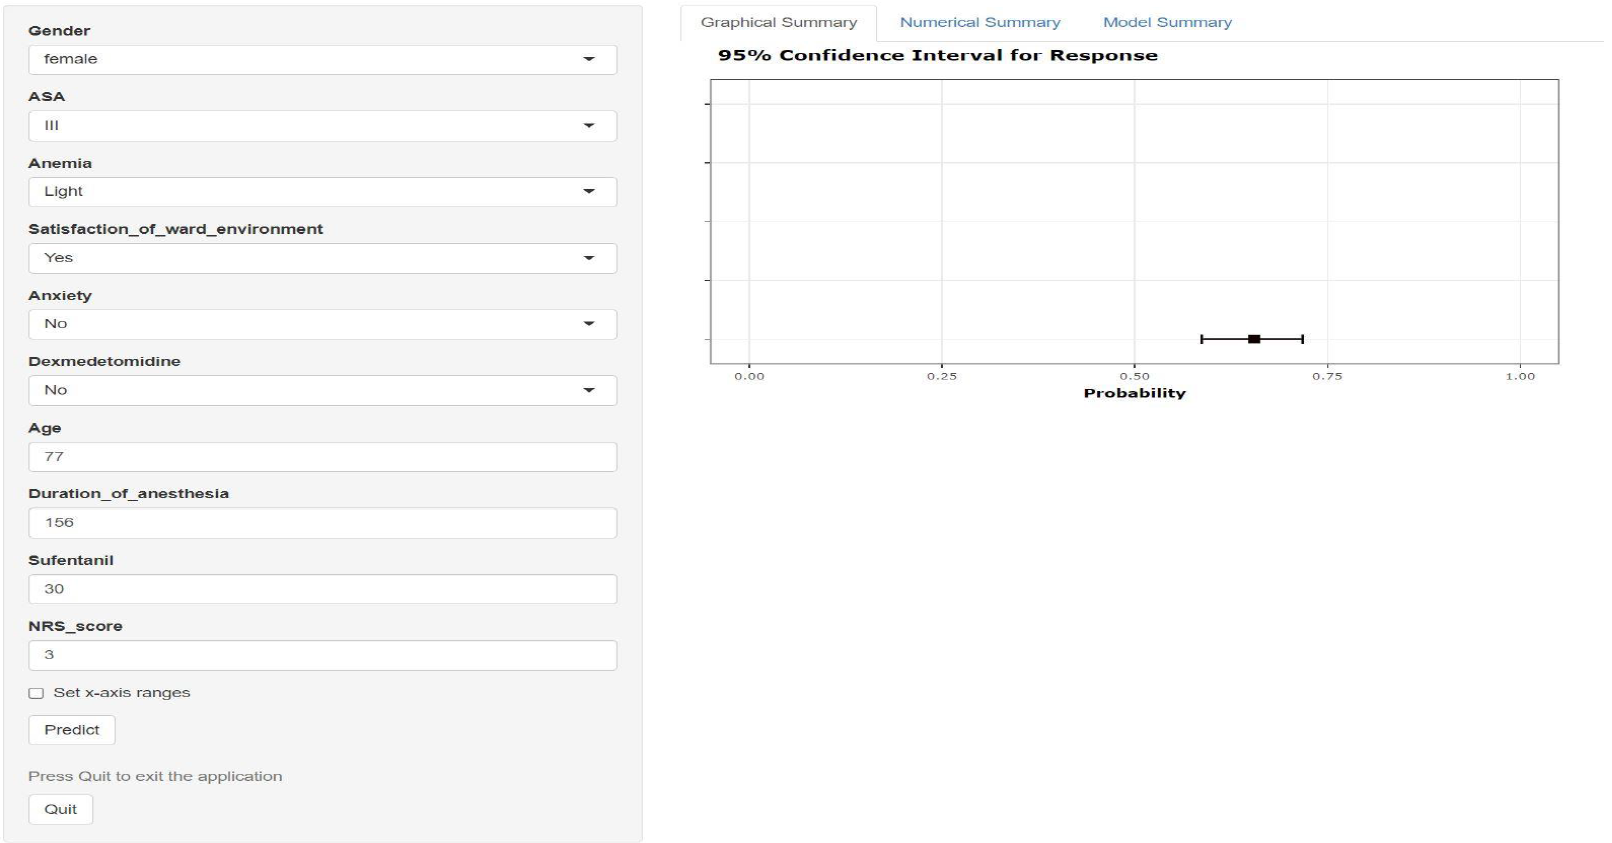

Supplement: Supplementary file 1 [file 536630%20Revised%20Supplementary%20Material.docx]
